# Supplementary material for: Melting temperatures of MgO under high pressure by micro-texture analysis
Source: PubMed Central journal article supplement (PMC5465366; doi:10.1038/ncomms15735), 2017-06-05
Supplement: ncomms15735-s1.pdf [file ncomms15735-s1.pdf]

## Supplementary information

### Supplementary Figures

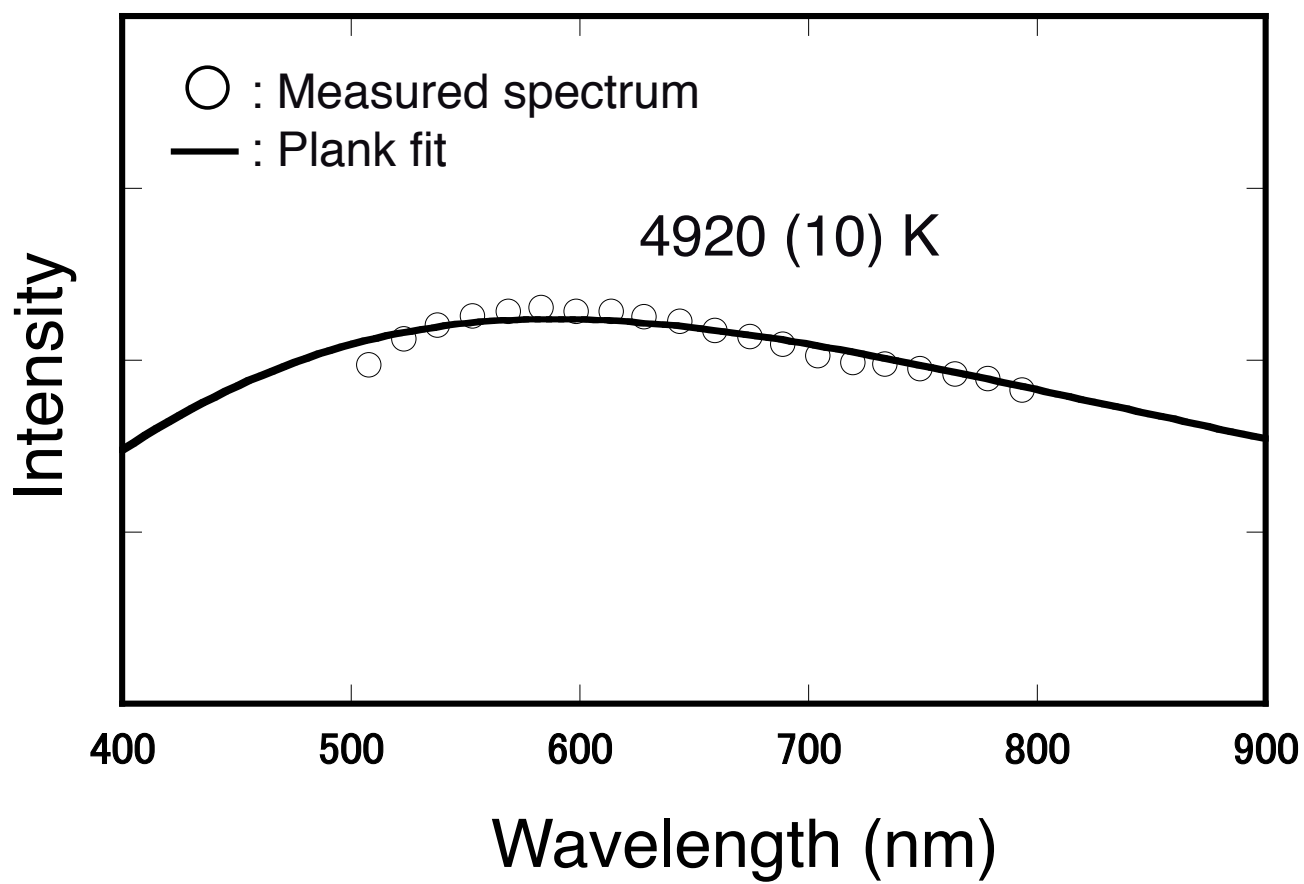

**Supplementary Figure 1. Typical example of the thermal emission spectrum of MgO under laser-heating at 18 GPa.** The circles and curve represent the radiation data and the fitting by the Planck formula, respectively. The temperature of the present spectrum was determined to be 4920 (10) K.

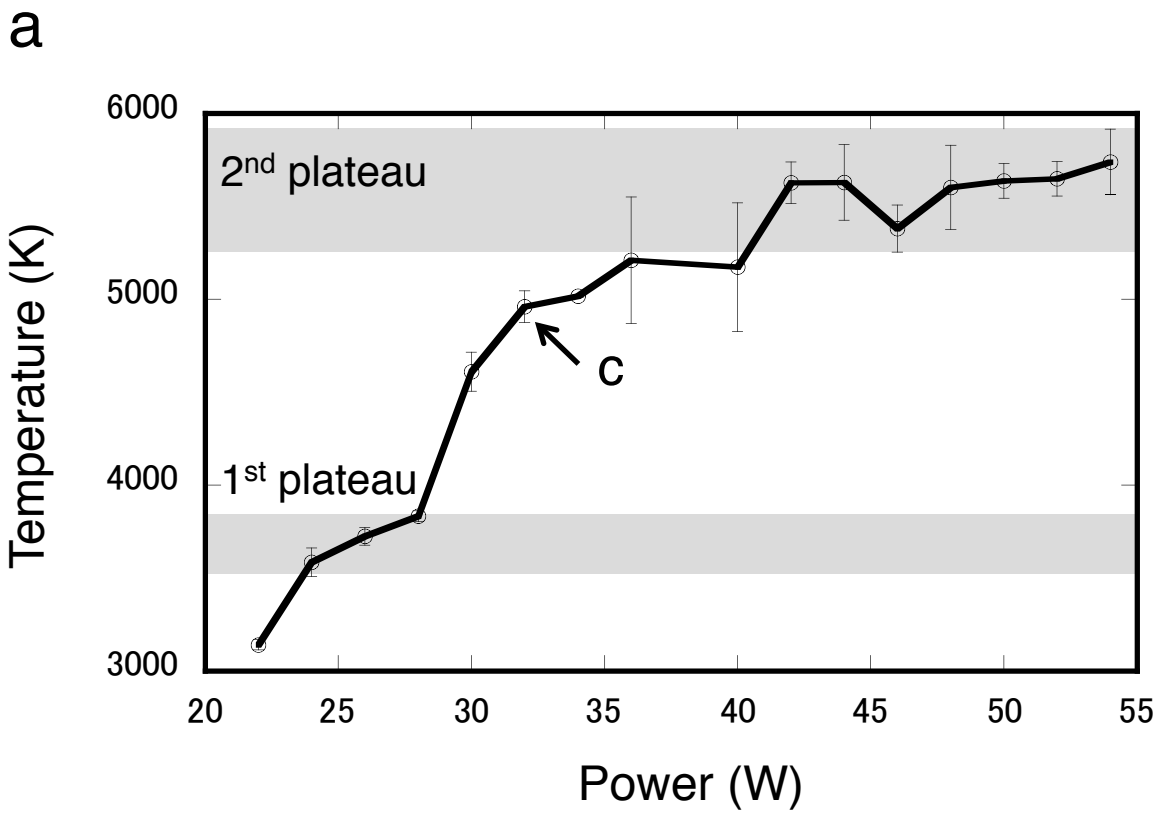

**b**

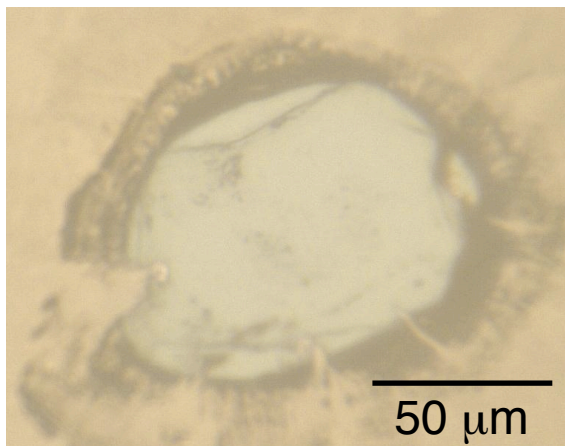

**c**

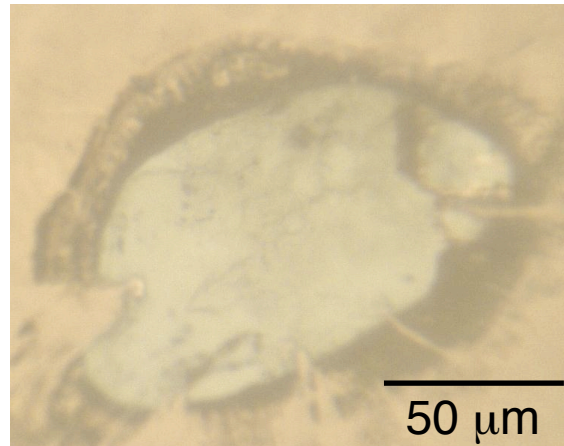

**Supplementary Figure 2. Relationship between temperature and the laser power in laser-heating at 46 GPa (a) and microscopic images of the sample before (b) and after heating up to ~5000 K (c). The sample was found to have expanded by ~20 % in the lateral direction after quenching from ~5000 K.**

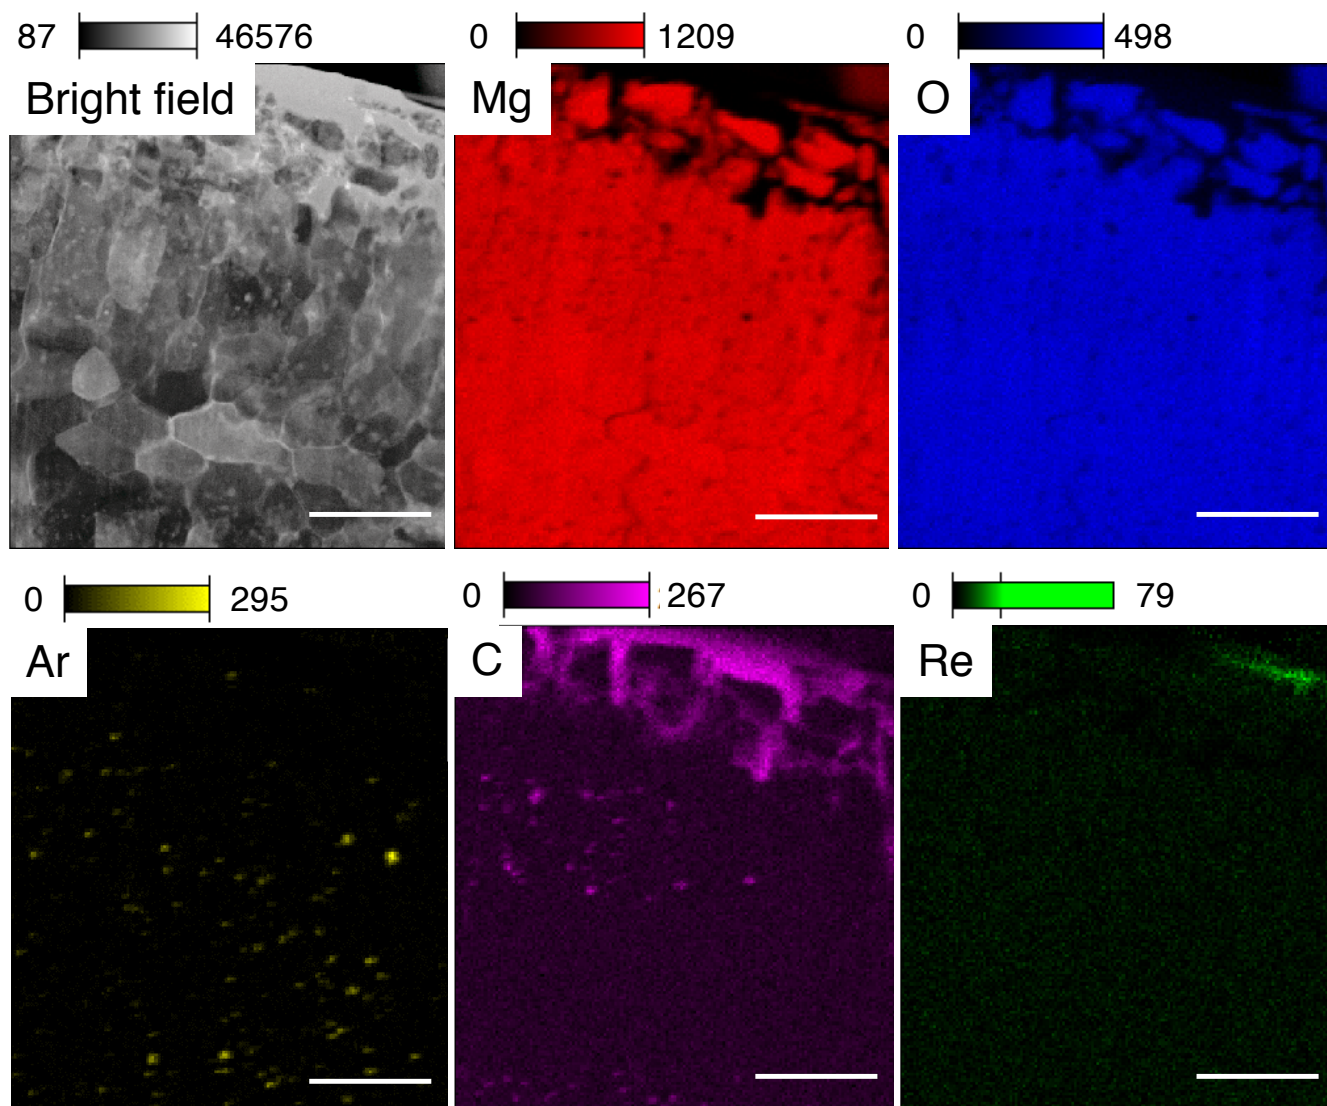

**Supplementary Figure 3. Bright-field scanning TEM image and X-ray maps of Mg, O, Ar, C, and Re collected from the laser-heated area of the sample recovered from 32 GPa and 5200 K. Scale bar represents 2  $\mu\text{m}$ . The X-ray maps identified that the quenched sample consists of elongated and granular MgO crystals with many small Ar inclusions. The concentrations of C and Re are artifacts, derived from the epoxy resin and re-deposition from the sputtered Re gasket during Ar ion milling, respectively.**

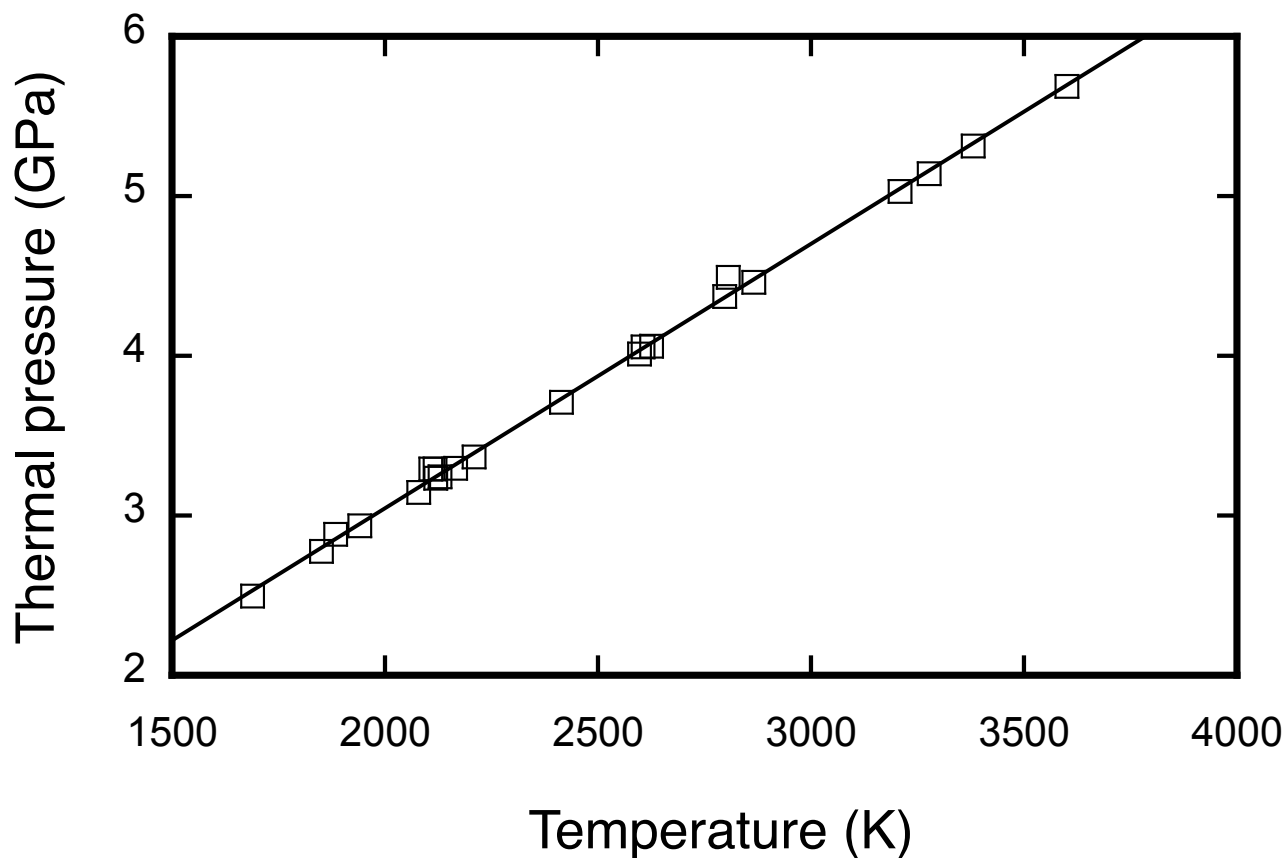

**Supplementary Figure 4. Thermal pressure ( $P_{th}$ ) of MgO under heating as a function of temperature.** The squares represent  $P_{th}$ s of the thermal EOS data obtained by static compression experiments using a CO<sub>2</sub> laser [1], which were estimated based on the Mie-Gruneisen-Debye model. The linear fit to the  $P_{th}$ s is also shown as the solid line.

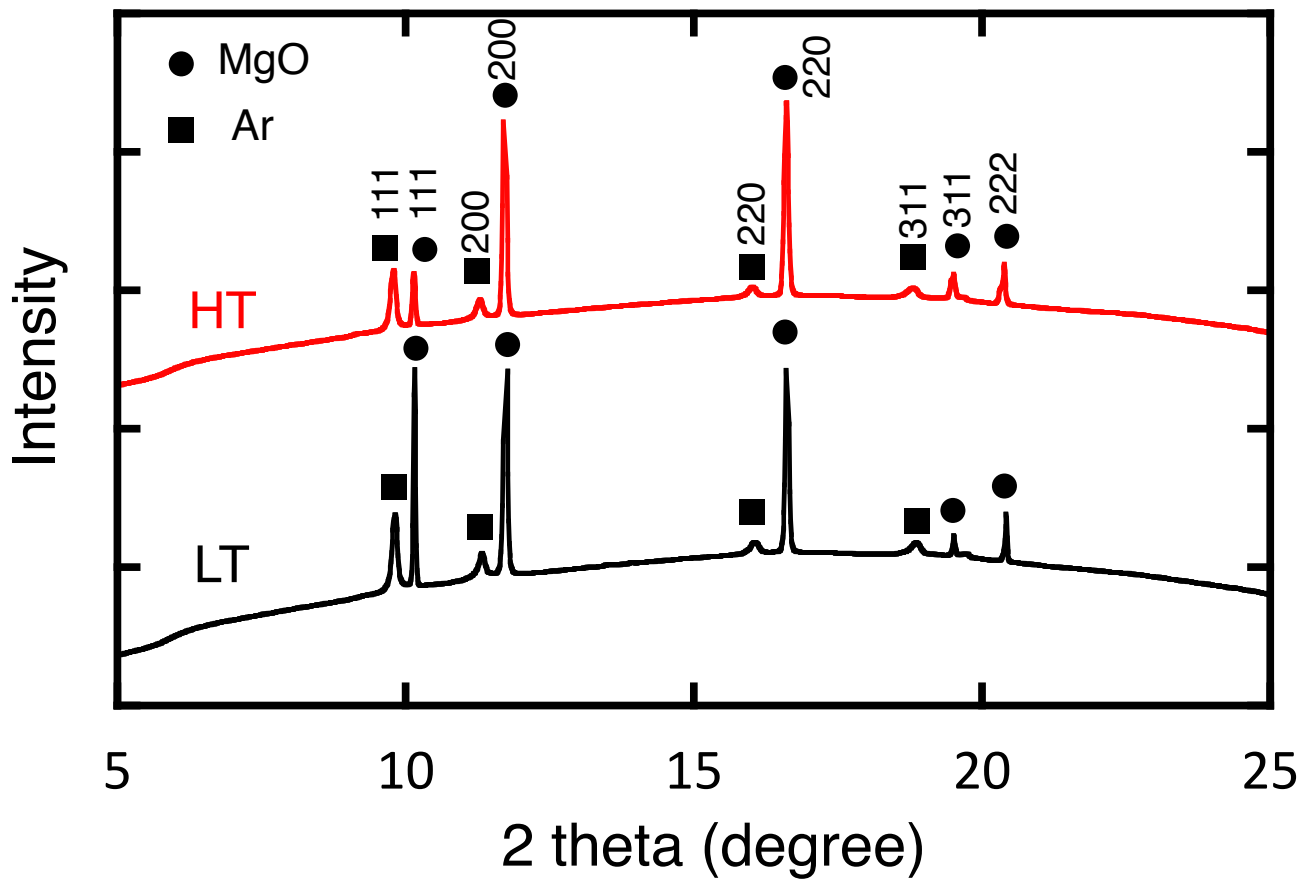

Supplementary Figure 5. XRD patterns of MgO after laser-heating at 5200 K at 23 GPa. The diffraction patterns were collected from the high temperature (HT) (red) and low temperature (LT) (black) regions.

## Supplementary Tables

**Supplementary Table 1. Observed melting temperature ( $T_m$ ) of MgO at each pressure condition together with estimated thermal pressure ( $P_{th}$ ). Errors in the  $T_m$  are shown in parentheses.**

| $P$ (GPa) | $P_{th}$ (GPa) | $T_m$ (K)  |
|-----------|----------------|------------|
| 8.7       | 6.6            | 4150 (200) |
| 14.2      | 7.3            | 4550 (220) |
| 17.7      | 7.9            | 4900 (290) |
| 23.1      | 8.4            | 5210 (150) |
| 23.4      | 8.1            | 5050 (70)  |
| 30.5      | 8.5            | 5250 (300) |
| 36.3      | 9.0            | 5600 (190) |

**Supplementary Table 2. Chemical compositions of MgO sample quenched from 5200 K at 33 GPa.**

EDS spectrum was taken from  $20 \times 20 \mu\text{m}^2$  squared area in the laser-heated hot spot. Quantification result was shown in weight percent, normalized to 100 (wt.%) total.

| Mg    | O     | Ar   | Total |
|-------|-------|------|-------|
| 39.53 | 60.07 | 0.39 | 100   |

## **Supplementary Note 1: Chemical analysis of the recovered samples**

In laser-heated diamond anvil cell experiments, the reaction between a sample and pressure medium or diamond anvil during heating is sometimes of concern [2]. Therefore, we carefully checked any undesirable chemical reaction using synchrotron X-ray diffraction (XRD) at BL10XU of Spring-8. A monochromatic X-ray beam with a wavelength of 0.4134 Å and a beam size of ca. 15 μm was used. The XRD patterns were collected on a CCD detector with a typical exposure time of 180 sec. XRD patterns obtained from both the high and low temperature regions of the sample after heating up to 5200 K at 23 GPa were perfectly indexed with MgO and no residual peaks were observed (Supplementary Fig. 5). Moreover, STEM-EDS analysis was performed to collect the X-ray maps of Mg, O, Ar, C, and Re from the laser-heated area of the sample recovered from 32 GPa and 5200 K (Supplementary Fig. 3), in addition to the quantification analysis under FE-SEM equipped with an energy-dispersive X-ray spectrometer (EDS; Oxford, X-Max 20) (Supplementary Table 2). We found no evidence of chemical reaction, although a trace amount of Ar, which is derived from Ar inclusions, was detected. We also checked the chemical impurity of the sample quenched from ~3100 K at ambient pressure in the air by micro-Raman spectroscopy and SEM-EDS and detected no signs of secondary phases such as brucite Mg(OH)<sub>2</sub>.

## **Supplementary Note 2: Melting of (Mg,Fe)SiO<sub>3</sub> perovskite**

An earlier laser-heated DAC study [3] determined the melting temperatures of (Mg,Fe)SiO<sub>3</sub> perovskite up to ~60 GPa based on the discontinuous change in the laser-power vs temperature profile obtained during heating using a single-sided CO<sub>2</sub> laser heating system. The method involved was probably the same as that used in their latter melting experiments for MgO [4]. Despite that the (Mg,Fe)SiO<sub>3</sub> sample was heated to ~5000 K at 63 GPa, neither a significant deformation of the sample nor that of gasket, such as observed in the present study, can be seen in their figure (Fig. 2 of [3]). One possible reason for this is that they used a lower-density phase (enstatite) as the starting material, which



transformed to perovskite during heating accompanied by a large volume reduction resulting in the relaxation of the thermal stress. According to the equation of states of the both phases [5], the volume reduction involved for enstatite-perovskite transition is as high as 10% at 25 GPa. The distinct fractures observed inside the  $(\text{Mg,Fe})\text{SiO}_3$  sample after heating (Fig. 2B of [3]) may indicate such a stress relaxation during heating.

## Supplementary References

- [1] Fiquet, G. Andrault, D. Itie, J. P. Gillet, P. and Richet, P. X-ray diffraction of periclase in a laser-heated diamond-anvil cell. *Phys. Earth Planet. Inter.* **95**, 1-17 (1996).
- [2] Dewaele, A. Mezouar, M. Guignot, N. and Loubeyre, P. High melting points of tantalum in a laser-heated diamond anvil cell. *Phys. Rev. Lett.* **104**, 255701 (2010).
- [3] Zerr, A. and Boehler, R. Melting of (Mg,Fe)SiO<sub>3</sub>-perovskite to 625 kilobars: Indication of a high melting temperature in the lower mantle. *Science* **262**, 553-555 (1993).
- [4] Zerr, A. and Boehler, R. Constraints on the melting temperature of the lower mantle from high-pressure experiments on MgO and magnesiowüstite. *Nature* **371**, 506-508 (1994).
- [5] Stixrude, L. and Lithgow-Bertelloni, C. Thermodynamics of mantle minerals-I. Physical properties. *Geophys. J. Int.* **162**, 610-632 (2005).
